# Supplementary material for: How to Educate the Public about Dental Trauma—A Scoping Review
Source: MDPI journal article supplement (doi:10.3390/ijerph19042479), 2022-02-21
Supplement: s1 [file s1]

**Table S1.** Full summary of studies focused on education in TDI (\* data not included into analysis).

| Authors, Year, Country             | Modality                                                 | Study Design/ Survey Instrument                                                   | Sample                                                                                                                                                                  | Intervention                                                                                                                                                                                                                                                                                                                                                                                                    | Term of Observation                                                                                                               | Major Findings                                                                                                                                                                                                                                                                                                                                                                                       |
|------------------------------------|----------------------------------------------------------|-----------------------------------------------------------------------------------|-------------------------------------------------------------------------------------------------------------------------------------------------------------------------|-----------------------------------------------------------------------------------------------------------------------------------------------------------------------------------------------------------------------------------------------------------------------------------------------------------------------------------------------------------------------------------------------------------------|-----------------------------------------------------------------------------------------------------------------------------------|------------------------------------------------------------------------------------------------------------------------------------------------------------------------------------------------------------------------------------------------------------------------------------------------------------------------------------------------------------------------------------------------------|
| Kahabuka et al. [19] 2003 Tanzania | a seminar <i>vs.</i> a guidelines sent by email          | post-test control group design<br><br>questionnaire adapted from previous studies | teachers<br><br>cluster sampling/ randomization at the level of school<br><br>Intervention groups: mailed guidelines group =185 seminar group =272<br><br>controls =198 | a brochure sent via email to the headmaster of the school with the request to convey the information to all teachers<br><br>a seminar for two selected teachers, school headmaster and teacher responsible for health affairs from each school + a brochure + a request to disseminate the information to their colleagues<br><br>presented topic: treatment of avulsed teeth<br><br>controls - no intervention | 6 month                                                                                                                           | the seminar was more effective than the guidance sent by e-mail in the teacher's attitude towards the replantation of the avulsed tooth and in the choice of an appropriate means of transport for the avulsed tooth ( $p<0.0005$ )<br><br>in some aspects (cleaning method or type of liquid they would use to clean a soiled avulsed tooth), no differences were observed between the three groups |
| McIntyre JD at al. [20] 2006 USA   | a pamphlet <i>vs.</i> the pamphlet and 10-minute lecture | pre-test-post-test study design<br><br>questionnaire developed by authors         | public elementary school teachers, teacher's assistants, nurses<br><br>cluster sampling/ randomization at the level of school<br><br>Intervention groups:               | Intervention group P: pamphlet available for 20 minutes<br>Intervention group P+L: pamphlet available for 20 minutes followed by the 10-minute lecture with Q&A session<br><br>presented topic: treatment of avulsed teeth                                                                                                                                                                                      | 3 months<br><br>questionnaire to be completed at the baseline, immediately after intervention and three months after intervention | both interventions were effective in increasing TTKS between baseline and follow-up (C vs P $p=0.015$ , C vs P+L $p=0.002$ ).<br><br>a 10-minute TDI lecture provided no additional benefit compared with an educational booklet (P vs P + L, NS).                                                                                                                                                   |

|                                                |           |                                                                                     |                                                                                                                                                                |                                                                                                                                                            |                                                                               |                                                                                                                                                                                                                                                                                                                                                                                                |
|------------------------------------------------|-----------|-------------------------------------------------------------------------------------|----------------------------------------------------------------------------------------------------------------------------------------------------------------|------------------------------------------------------------------------------------------------------------------------------------------------------------|-------------------------------------------------------------------------------|------------------------------------------------------------------------------------------------------------------------------------------------------------------------------------------------------------------------------------------------------------------------------------------------------------------------------------------------------------------------------------------------|
|                                                |           |                                                                                     | pamphlet (P) = 37<br>pamphlet +<br>lecture (P+L)= 29<br><br>controls (C) = 45                                                                                  | controls - no intervention                                                                                                                                 |                                                                               |                                                                                                                                                                                                                                                                                                                                                                                                |
| Holan et al. [21]<br>2006<br>Israel            | a seminar | pre-test post-test study design<br><br>questionnaire developed by authors           | physical education teachers<br><br>cluster sampling<br><br>baseline =126<br>follow up = 100 (including 70 teachers attending the seminar and 30 not attenders) | seminar + question and answer session on the topic presented at the biennial meeting of physical education teachers<br><br>topic presented: tooth avulsion | 10 months<br><br>pre-test carried out 6 months prior to intervention          | the percentage of teachers who gave correct answers was significantly higher in the second questionnaire than in the first one (p<0.001)<br><br>no difference in the percentage of teachers who gave correct answers in the second questionnaire among seminar participants and non-participants<br><br>"contamination effect" - sharing and disseminating information provided at the seminar |
| Al-Asfor A et al. [22]<br>2008<br>Kuwait       | a lecture | one-group pre-test post-test study design<br><br>questionnaire developed by authors | teachers<br><br>cluster sampling<br><br>intervention group = 43                                                                                                | 30-minute lecture + question-and-answer session held at the school<br><br>topic presented: avulsion and replantation of a tooth                            | after intervention<br><br>pre-test carried out 6 months prior to intervention | Increase in knowledge in all surveyed areas from low to sufficient<br><br>problems with reaching the whole population                                                                                                                                                                                                                                                                          |
| Al-Asfor A, Andersson L [23]<br>2008<br>Kuwait | a leaflet | post-test control group design                                                      | parents<br><br>cluster sampling/                                                                                                                               | a leaflet<br><br>presented topic: tooth avulsion and replantation                                                                                          | 1 week                                                                        | subjects reading a leaflet got better scores than controls (data were not statistically analysed)                                                                                                                                                                                                                                                                                              |

|                                                      |           |                                                                                                                                                                                    |                                                                                                                                                                                                    |                                                                                                                                                       |          |                                                                                                                                                                                                        |
|------------------------------------------------------|-----------|------------------------------------------------------------------------------------------------------------------------------------------------------------------------------------|----------------------------------------------------------------------------------------------------------------------------------------------------------------------------------------------------|-------------------------------------------------------------------------------------------------------------------------------------------------------|----------|--------------------------------------------------------------------------------------------------------------------------------------------------------------------------------------------------------|
|                                                      |           | questionnaire developed by authors                                                                                                                                                 | randomization at the level of participant<br><br>intervention group = 85<br><br>controls = 75                                                                                                      | controls - no intervention                                                                                                                            |          | for an extra-oral time the knowledge gain was not sufficient                                                                                                                                           |
| Lieger O et al. [24] 2009 Switzerland                | a poster  | post-test control group design<br><br>self-administrated questionnaire send by mail to schools (10 questionnaires /school)<br><br>questionnaire form adapted from previous studies | teachers cluster sampling<br><br>intervention group (teachers working in the area with poster distribution) = 185<br><br>controls (teachers working in the area without poster distribution) = 326 | a poster sent to all schools from Canton of Bern<br><br>presented topics: the emergency management of injured teeth<br><br>controls – no intervention | 5 years  | teachers who worked in the area where the posters were distributed had more knowledge about the management of different types of dental injuries (data not statistically analysed)                     |
| <u>Frujeri M de L, Costa ED Jr.</u> [25] 2009 Brazil | a lecture | pre-test post-test study design<br><br>questionnaire adapted from previous studies                                                                                                 | different professionals cluster sampling<br><br>intervention groups: elementary school teachers =102,                                                                                              | a 40 minute lecture + Q&A session<br><br>presented topics: tooth avulsion                                                                             | 2 months | in each group the percentage of correct answers was significantly higher after the lecture ( $p<0.0001$ in teachers, physical education specialists and bank employees and $p<0.01$ in paediatricians) |

|                                    |           |                                                                                                     |                                                                                                                                                       |                                                                                                                                             |                                |                                                                                                                                                                                                                                  |
|------------------------------------|-----------|-----------------------------------------------------------------------------------------------------|-------------------------------------------------------------------------------------------------------------------------------------------------------|---------------------------------------------------------------------------------------------------------------------------------------------|--------------------------------|----------------------------------------------------------------------------------------------------------------------------------------------------------------------------------------------------------------------------------|
|                                    |           |                                                                                                     | physical education professionals = 124, bank employees = 103, dentists* = 100, paediatricians = 50                                                    |                                                                                                                                             |                                |                                                                                                                                                                                                                                  |
| Levin et al. [26] 2010 Israel      | a lecture | post-test control group design<br><br>questionnaire adapted from previous studies                   | 18-year-old men military recruits<br><br>cluster sampling/randomization at the level of participant<br><br>intervention group = 199<br>controls = 137 | a 60-minute lecture<br><br>presented topics: body facial and oral injuries and their first-aid management<br><br>controls - no intervention | immediately after intervention | the intervention group presented better knowledge than controls (p<0.001)<br><br>a single lecture was not sufficient to deliver complete knowledge                                                                               |
| Karande N et al. [27] 2012 India   | a lecture | one-group pre-test post-test study design<br><br>multiple choice questionnaire developed by authors | teachers<br><br>cluster sampling<br><br>Intervention group = 216                                                                                      | a lecture<br><br>presented topics: emergency management of dentoalveolar injuries                                                           | 3 months                       | improvements in knowledge were observed in the areas studied: TDI epidemiology, first aid in tooth avulsion and tooth fracture (no statistical analysis presented)<br><br>the level of knowledge on oral prostheses remained low |
| Arikan and Sönmez [28] 2012 Turkey | a leaflet | one-group pre-test post-test study design                                                           | teachers<br><br>cluster sampling                                                                                                                      | a leaflet<br><br>presented topics: traumatic dental injuries and their emergency management                                                 | 1 month                        | teachers' knowledge of TDI increased significantly (p = 0.0001) after distribution of the information leaflet                                                                                                                    |

|                                                   |                                        |                                                                                                                                    |                                                                                                                                                                |                                                                                                                                                                                                                                            |          |                                                                                                                                                                                                                                                  |
|---------------------------------------------------|----------------------------------------|------------------------------------------------------------------------------------------------------------------------------------|----------------------------------------------------------------------------------------------------------------------------------------------------------------|--------------------------------------------------------------------------------------------------------------------------------------------------------------------------------------------------------------------------------------------|----------|--------------------------------------------------------------------------------------------------------------------------------------------------------------------------------------------------------------------------------------------------|
|                                                   |                                        | questionnaire developed by authors                                                                                                 | intervention group = 450                                                                                                                                       |                                                                                                                                                                                                                                            |          |                                                                                                                                                                                                                                                  |
| Skapetis et al. [29] 2012 Australia               | an interactive and multimodal workshop | one-group pre-test post-test study design<br><br>questionnaire developed by the authors                                            | physicians, nurse practitioners, medical students recruited<br><br>cluster sampling<br><br>intervention group: at the baseline = 242<br>at the follow up = 181 | workshops (lecture, video presentation, discussion, case study, models)<br><br>presented topics: dental nomenclature, dental anaesthesia, effective emergency treatment for common dental trauma, intraoral haemorrhage, dental infections | 6 months | the self-reported improvement in proficiency on dental emergency management including avulsion and dental trauma ( $p<0.001$ )                                                                                                                   |
| Baginska and Wilczynska-Borawska [30] 2012 Poland | a lecture                              | post-test control group design<br><br>questionnaire adapted from previous studies                                                  | school nurses<br><br>cluster sampling<br><br>intervention group = 38<br><br>controls = 12                                                                      | a lecture conducted two years prior to survey<br><br>presented topics: management of TDI<br><br>controls - no intervention                                                                                                                 | 2 years  | a strong correlation between the level of knowledge and the participation in the lecture on dental trauma management ( $p<0.01$ )                                                                                                                |
| Emerich et al. [31] 2013 Poland                   | a lecture + an additional task         | pre-test-post-test control group design<br><br>questionnaire form (three different scenarios of TDI) adapted from previous studies | physical education students<br><br>cluster sampling/ randomization at the level of participant<br><br>intervention group = 49                                  | intervention group: a 30 minute lecture + an additional task of preparing a presentation on dental trauma to retain knowledge<br><br>controls: a 30 minute lecture + an additional task of preparing a presentation on different topic     | 1 year   | a lecture was sufficient to introduce basic knowledge on dental trauma ( $p<0.001$ )<br><br>the effect was long-lasting<br><br>the additional task (preparing of the presentation) had no influence on the long term retention of knowledge (NS) |

|                                         |                             |                                                                                                                                                                  |                                                                                                                                                                                   |                                                                                                                                                                                                                                                                                                 |                                                                                    |                                                                                                                                                                                                                                                                                                                                                                                                                                                                                                            |
|-----------------------------------------|-----------------------------|------------------------------------------------------------------------------------------------------------------------------------------------------------------|-----------------------------------------------------------------------------------------------------------------------------------------------------------------------------------|-------------------------------------------------------------------------------------------------------------------------------------------------------------------------------------------------------------------------------------------------------------------------------------------------|------------------------------------------------------------------------------------|------------------------------------------------------------------------------------------------------------------------------------------------------------------------------------------------------------------------------------------------------------------------------------------------------------------------------------------------------------------------------------------------------------------------------------------------------------------------------------------------------------|
|                                         |                             |                                                                                                                                                                  | controls = 50                                                                                                                                                                     | presented permanent injuries                                                                                                                                                                                                                                                                    | topics: dentition                                                                  |                                                                                                                                                                                                                                                                                                                                                                                                                                                                                                            |
| Soubra BN and Debs NN [32] 2013 Lebanon | an audio and visual methods | 1st intervention one-group pre-test post-test study design<br><br>2nd intervention post-test control group design<br><br>two-questions test developed by authors | pupils (8-11 years old)<br><br>cluster sampling/ randomization – not specified<br><br>1st intervention Intervention group = 172<br><br>2nd intervention group A = 86 group B = 86 | 1st intervention: a cartoon movie<br><br>2nd intervention: visual <i>vs.</i> audio modes (group A - a cartoon twice: once without verbal commentary and once with comments, group B listen to the story twice, second time simultaneously with cartoon)<br><br>presented topics: tooth avulsion | 1st intervention: 3 months<br><br>2nd intervention: immediately after intervention | 1st intervention watching cartoon movie resulted in increasing the knowledge ( $p<0.001$ )<br><br>2nd intervention a message repetition increased the number of correct answers (group A $p<0.001$ , group B $p=0.03$ )<br><br>both methods of providing information (two projections and one reading <i>vs.</i> two readings and one projection) were similarly effective (NS)<br><br>telling a story has a greater impact than a silent movie ( $p<0.001$ )<br><br>children preferred cartoon than story |
| Ghaderi et al. [33] 2013 Iran           | a leaflet                   | post-test control group design<br><br>questionnaire adapted from previous studies                                                                                | parents<br><br>cluster sampling/ randomization at the level of participant<br><br>intervention group =75                                                                          | a leaflet + an assistance of a senior dental student<br><br>controls - no intervention<br><br>presented topics: tooth avulsion                                                                                                                                                                  | 1 week                                                                             | the leaflet + the assistance of knowledgeable dental staff improved the level of parents' knowledge (data were not statistically analysed)                                                                                                                                                                                                                                                                                                                                                                 |

|                                          |           |                                                                                                                            |                                                                                                                                                 |                                                                                                                                                  |              |                                                                                                                                                                                                                                                                     |
|------------------------------------------|-----------|----------------------------------------------------------------------------------------------------------------------------|-------------------------------------------------------------------------------------------------------------------------------------------------|--------------------------------------------------------------------------------------------------------------------------------------------------|--------------|---------------------------------------------------------------------------------------------------------------------------------------------------------------------------------------------------------------------------------------------------------------------|
|                                          |           |                                                                                                                            | controls = 75                                                                                                                                   |                                                                                                                                                  |              |                                                                                                                                                                                                                                                                     |
| Pujita et al. [34]<br>2013<br>India      | a lecture | pre-test-post-test study design<br><br>questionnaire developed by authors                                                  | teachers<br><br>cluster sampling<br><br>intervention group = 1000 (urban group = 500 and rural group = 500)                                     | a 30 minute lecture + Q&A session<br><br>presented topics: management of TDI                                                                     | 3 months     | an improvement in teachers' knowledge was observed (data were not statistically analysed)<br><br>according to the authors, the knowledge gain was below the expected level                                                                                          |
| Young C et al. [35]<br>2013<br>Hong Kong | a poster  | cluster randomised controlled trial<br><br>post-test control group design<br><br>questionnaire adapted from previous study | teachers<br><br>cluster sampling/ randomization at the level of school<br><br>intervention group = 196<br><br>controls = 212                    | a poster (three copies available for teachers for two weeks)<br><br>presented topics: dental trauma management<br><br>controls - no intervention | up to 1 week | the posters improved the knowledge about dental trauma management in those subjects who had not previously learned about dental emergencies from other sources than first aid training (p<0.0001)                                                                   |
| Young C et al. [36]<br>2014<br>Hong Kong | a poster  | cluster randomised controlled trial<br><br>post-test control group design<br><br>questionnaire adapted from previous study | pupils (11-20 years)<br><br>cluster sampling/ randomization at the level of school<br><br>intervention group = 364<br><br>controls = 303 pupils | a poster (three copies available for pupils for two weeks)<br><br>presented topics: dental trauma management<br><br>controls - no intervention   | up to 1 week | a two week display of the educational poster improved the level of pupils' knowledge on the emergency management of dental trauma in comparison to the control group (p=0.04)<br><br>Respondents have problems with acquisition of some information from the poster |

|                                    |                                                          |                                                                                                              |                                                                                                                                          |                                                                                                                                                                                       |                                                                                                                                |                                                                                                                                                                                                                                                                                |
|------------------------------------|----------------------------------------------------------|--------------------------------------------------------------------------------------------------------------|------------------------------------------------------------------------------------------------------------------------------------------|---------------------------------------------------------------------------------------------------------------------------------------------------------------------------------------|--------------------------------------------------------------------------------------------------------------------------------|--------------------------------------------------------------------------------------------------------------------------------------------------------------------------------------------------------------------------------------------------------------------------------|
| Raouf et al. [37]<br>2014<br>Iran  | a multimodal educational intervention (lecture + poster) | one-group pre-test post-test design<br><br>questionnaire adapted from previous study                         | health teachers<br><br>cluster sampling<br><br>intervention group =38                                                                    | a 120 minute lecture + Q&A session + an informative poster<br><br>presented topics: general concepts of dental trauma and emergency handling of crown fractures and avulsion injuries | 3 years<br><br>questionnaire to be completed at the baseline, immediately after intervention and three year after intervention | a multifaceted educational programme resulted in significant short- and long-term improvements in TDI emergency management knowledge (p<0.017)<br><br>participants' self-assessment of their ability to take appropriate action when needed increased significantly (p=0.0001) |
| Ghadimi et al [38]<br>2014<br>Iran | a poster                                                 | pre-test post-test control group design<br><br>questionnaire developed by the authors including cases of TDI | school health teachers<br><br>cluster sampling/ randomization at the level of school<br><br>intervention group = 30<br><br>controls = 10 | an educational poster<br><br>presented topics: management of TDI<br><br>controls: no intervention                                                                                     | 1 month                                                                                                                        | the percentage of correct answers in the test group increased significantly in the test group one month after the intervention (p<0.001)                                                                                                                                       |



|                                       |                                                                                                  |                                                                                                                                                             |                                                                                                                                                                              |                                                                                                                                                                                                             |                                                                                                                                              |                                                                                                                                                                                                                                                                               |
|---------------------------------------|--------------------------------------------------------------------------------------------------|-------------------------------------------------------------------------------------------------------------------------------------------------------------|------------------------------------------------------------------------------------------------------------------------------------------------------------------------------|-------------------------------------------------------------------------------------------------------------------------------------------------------------------------------------------------------------|----------------------------------------------------------------------------------------------------------------------------------------------|-------------------------------------------------------------------------------------------------------------------------------------------------------------------------------------------------------------------------------------------------------------------------------|
| Grewal et al. [39]<br>2015<br>India   | a multimodal educational intervention (flip cards + poster + interactive sessions and a lecture) | pre-test post-test study design<br><br>two questionnaires developed by authors: one for parents and school teachers and second for children aged 7–12 years | school teachers/sport coaches, pupils (7–12 years old), parents<br><br>cluster sampling<br><br>intervention groups: pupils = 200 parents = 200 teachers/sports coaches = 189 | 1st step: flip cards + a poster placed in the medical room at school<br><br>2nd step: reinforcement session by an interactive sessions and a re-orientation lecture<br><br>presented topics: tooth avulsion | 6 months<br><br>questionnaire to be completed two months before intervention, one month after intervention and six months after intervention | an improvement in the knowledge of teachers, parents and pupils about tooth avulsion was observed ( $p < 0.001$ )                                                                                                                                                             |
| Perazzo et al. [40]<br>2015<br>Brazil | a lecture                                                                                        | one-group pre-test post-test study design<br><br>questionnaire adapted from previous studies                                                                | firefighters<br><br>cluster sampling<br><br>intervention group = 90                                                                                                          | a lecture + a Q&A session<br><br>presented topics: tooth avulsion                                                                                                                                           | 6 months<br><br>questionnaire to be completed at the baseline, immediately after intervention and six months after intervention              | the intervention resulted in significant short- and long-term improvements in knowledge of tooth avulsion ( $p < 0.001$ )<br><br>attitudes of paramedics towards tooth replantation decreased over time ( $p = 0.001$ )<br><br>the need for repeated interventions was raised |
| Iskander et al. [41]<br>2016<br>USA   | a mobile application <i>vs.</i> a poster                                                         | post-test study design<br><br>written questionnaire developed by authors and oral interview questions                                                       | parents<br><br>cluster sampling/randomization at the level of participant<br><br>intervention groups:                                                                        | 1st intervention: one educational tool (mobile application or poster) was used<br><br>2nd intervention: subjects received the other tool to find the participants' preferences                              | immediately after intervention                                                                                                               | 1st intervention: both a poster and a mobile healthcare application are effective in delivering TDI information, but respondents using an application significantly more likely immediate replantation as a best option in tooth avulsion ( $p < 0.007$ )                     |

|                                                |                                                                                                    |                                                                                      |                                                                                                                                                                           |                                                                                                                                                                            |                                                                                                                                 |                                                                                                                                                                                                                                                                      |
|------------------------------------------------|----------------------------------------------------------------------------------------------------|--------------------------------------------------------------------------------------|---------------------------------------------------------------------------------------------------------------------------------------------------------------------------|----------------------------------------------------------------------------------------------------------------------------------------------------------------------------|---------------------------------------------------------------------------------------------------------------------------------|----------------------------------------------------------------------------------------------------------------------------------------------------------------------------------------------------------------------------------------------------------------------|
|                                                |                                                                                                    | conducted by the researcher                                                          | mobile application = 45<br>poster = 44                                                                                                                                    | presented topics:<br>management of TDI                                                                                                                                     |                                                                                                                                 | 2nd intervention:<br>the participants preferred the tool they were given first                                                                                                                                                                                       |
| Cruz-da-Silva BR et al. [42]<br>2016<br>Brazil | a multimodal educational intervention (lecture + pamphlet)                                         | one-group pre-test post-test study design<br><br>questionnaire developed by authors  | non-dental health professional involved in the emergency care service<br><br>cluster sampling<br><br>intervention group = 73 (11 physicians, 41 nurses and 21 paramedics) | a 40 minute lecture + a pamphlet<br><br>presented topics: tooth avulsion                                                                                                   | 6 months<br><br>questionnaire to be completed at the baseline, immediately after intervention and six months after intervention | improvement in nurses' attitudes towards tooth replantation was observed both immediately after the intervention and six months later (p<0.001)                                                                                                                      |
| Taranath M et al. [43]<br>2017<br>India        | a PowerPoint presentation                                                                          | one-group pre-test post-test design<br><br>questionnaire adapted from previous study | school teachers<br><br>cluster sampling<br><br>intervention group = 214                                                                                                   | a PowerPoint presentation and demonstration of the first aid procedures in tooth avulsion using a typodont<br><br>presented topics: tooth avulsion                         | 1 month                                                                                                                         | the knowledge and the attitude towards the management of tooth avulsion were raised (p<0.0001)                                                                                                                                                                       |
| Al-Musawi A et al. [44]<br>2017<br>Kuwait      | a lecture vs. a lecture + access to the Dental Trauma App vs. access to the Dental Trauma App only | pre-test post-test study design<br><br>questionnaire adapted from previous study     | female teacher<br><br>convenience sampling<br><br>intervention groups:<br>Group 1: lecture = 32                                                                           | a 30-minute lecture<br><br>a lecture + access to the Dental Trauma App when being tested<br><br>no formal instructions + access to the Dental Trauma App when being tested | immediately after intervention                                                                                                  | all methods were effective means of knowledge transfer about tooth avulsion (group 1 p=0.001, group 2 p=0.019, group 3 p=0.000)<br><br>the Dental Trauma App alone was superior to a lecture-based delivery of information (the active learning component) (p<0.001) |

|                                               |                                                                                      |                                                                                        |                                                                                                                  |                                                                                                                         |                                                                                                                                           |                                                                                                                                                                       |
|-----------------------------------------------|--------------------------------------------------------------------------------------|----------------------------------------------------------------------------------------|------------------------------------------------------------------------------------------------------------------|-------------------------------------------------------------------------------------------------------------------------|-------------------------------------------------------------------------------------------------------------------------------------------|-----------------------------------------------------------------------------------------------------------------------------------------------------------------------|
|                                               |                                                                                      |                                                                                        | Group 2: lecture + App = 27<br>Group 3: App = 28                                                                 | presented topics: tooth avulsion                                                                                        |                                                                                                                                           |                                                                                                                                                                       |
| Yordi et al. [45] 2017 Lebanon                | a multimodal educational intervention (Power Point presentation + brochure + poster) | pre-test post-test study design<br>questionnaire adapted from previous study           | Teachers<br>cluster sampling/randomization at the level of school<br>intervention groups = 300<br>controls = 300 | a Power point presentation + a brochure + a poster<br>presented topics: management of TDI<br>controls - no intervention | 6 months                                                                                                                                  | the educational program using more than one modality proved to be effective in improving teachers' knowledge (p<0.001)<br><br>the improvement persisted over the time |
| Al Sari et al. [46] 2018 United Arab Emirates | a multimodal educational intervention (workshop + poster)                            | one-group pre-test post-test study design<br>questionnaire adapted from previous study | school nurses and physical education teachers<br>cluster sampling<br>Intervention group = 68                     | a workshop + a poster<br>presented topics: management of TDI                                                            | 3 months<br>questionnaire to be completed at the baseline (A), immediately after intervention (B) and three months after intervention (C) | a significant improvement in the score of knowledge between survey A and B and A and C was observed (p<0.01)<br><br>the knowledge gain sustained after 3 months       |
| Nagata et al. [47] 2018 Brazil                | a lecture                                                                            | pre-test post-test study design<br>questionnaire developed by authors                  | health courses' students<br>cluster sampling<br>intervention groups: dentistry students* = 70                    | a 40-minute lecture + a Q&A session<br>presented topics: avulsion and crown fractures                                   | immediately after intervention                                                                                                            | there was a significant improvement in knowledge of dental emergencies following the educational intervention (p<0.001)                                               |

|                                          |                                                |                                                                                                   |                                                                                                                                                                       |                                                                                                               |                                                                                                                                                              |                                                                                                                                                                                                                                                                        |
|------------------------------------------|------------------------------------------------|---------------------------------------------------------------------------------------------------|-----------------------------------------------------------------------------------------------------------------------------------------------------------------------|---------------------------------------------------------------------------------------------------------------|--------------------------------------------------------------------------------------------------------------------------------------------------------------|------------------------------------------------------------------------------------------------------------------------------------------------------------------------------------------------------------------------------------------------------------------------|
|                                          |                                                |                                                                                                   | nursing students = 33<br>speech therapy students = 22                                                                                                                 |                                                                                                               |                                                                                                                                                              |                                                                                                                                                                                                                                                                        |
| Nashine et al. [48]<br>2018<br>India     | an audio vs. audio-visual aids (not specified) | one-group pre-test post-test study design<br><br>questionnaire developed by authors               | teachers<br><br>two-stage cluster sampling<br><br>Intervention group = 158<br><br>Participants were divided into audio and audio-visual groups (number not specified) | an intervention through audio or audio-visual aids (not specified)<br><br>presented topics: management of TDI | immediately after intervention                                                                                                                               | an improvement in knowledge and attitude was observed for whole group (data were not statistically analysed)<br><br>no difference was found with regard to audio and audio-visual aids (NS)                                                                            |
| Niviethitha et al. [49]<br>2018<br>India | an interactive educational DVD video           | one-group pre-test post-test study design<br><br>questionnaire adapted from previous study        | teachers<br><br>randomisation at the level of school and participant<br><br>intervention group = 301                                                                  | an interactive educational DVD video (7-8 minutes)<br><br>presented topics: management of TDI                 | immediately after intervention                                                                                                                               | significant improvement in knowledge of TDI management ( $p < 0.0001$ )<br><br>increase in participants' attitude in dealing with tooth avulsion ( $p < 0.0001$ )                                                                                                      |
| Razeghi et al. [50]<br>2019<br>Iran      | a leaflet vs. a lecture                        | cluster randomized controlled trial<br><br>pre-test post-test study design<br><br>a questionnaire | teachers<br><br>cluster sampling/ randomisation at the level participant<br><br>intervention groups: leaflet = 154                                                    | a leaflet<br><br>a 45-minute lecture<br><br>presented topics: management of TDI                               | 6 months<br><br>questionnaire to be completed at the beginning, one month after the end of the intervention and six months after the end of the intervention | knowledge gains were observed in both intervention groups ( $p < 0.001$ )<br><br>no statistically significant difference in mean knowledge and self-practice scores between the two intervention groups (NS)<br><br>self-practice was weakly correlated with knowledge |

|                                    |                                                          | developed by authors                                                              | lecture = 138                                                                                                                                                                 |                                                                                                                                                                                                                                                                                                                                                                                                                 |                                                                                                                |                                                                                                                                                                                                                                                                                                                                                                                                      |
|------------------------------------|----------------------------------------------------------|-----------------------------------------------------------------------------------|-------------------------------------------------------------------------------------------------------------------------------------------------------------------------------|-----------------------------------------------------------------------------------------------------------------------------------------------------------------------------------------------------------------------------------------------------------------------------------------------------------------------------------------------------------------------------------------------------------------|----------------------------------------------------------------------------------------------------------------|------------------------------------------------------------------------------------------------------------------------------------------------------------------------------------------------------------------------------------------------------------------------------------------------------------------------------------------------------------------------------------------------------|
| Authors, Year, country             | Modality                                                 | Study design/ Survey instrument                                                   | Sample                                                                                                                                                                        | Intervention                                                                                                                                                                                                                                                                                                                                                                                                    | Term of observation                                                                                            | Major findings                                                                                                                                                                                                                                                                                                                                                                                       |
| Kahabuka et al. [19] 2003 Tanzania | a seminar <i>vs.</i> a guidelines sent by email          | post-test control group design<br><br>questionnaire adapted from previous studies | teachers<br><br>cluster sampling/ randomization at the level of school<br><br>Intervention groups:<br>mailed guidelines group =185<br>seminar group =272<br><br>controls =198 | a brochure sent via email to the headmaster of the school with the request to convey the information to all teachers<br><br>a seminar for two selected teachers, school headmaster and teacher responsible for health affairs from each school + a brochure + a request to disseminate the information to their colleagues<br><br>presented topic: treatment of avulsed teeth<br><br>controls - no intervention | 6 month                                                                                                        | the seminar was more effective than the guidance sent by e-mail in the teacher's attitude towards the replantation of the avulsed tooth and in the choice of an appropriate means of transport for the avulsed tooth ( $p<0.0005$ )<br><br>in some aspects (cleaning method or type of liquid they would use to clean a soiled avulsed tooth), no differences were observed between the three groups |
| McIntyre JD at al. [20] 2006 USA   | a pamphlet <i>vs.</i> the pamphlet and 10-minute lecture | pre-test-post-test study design<br><br>questionnaire developed by authors         | public elementary school teachers, teacher's assistants, nurses<br><br>cluster sampling/ randomization at the level of school                                                 | Intervention group P: pamphlet available for 20 minutes<br>Intervention group P+L: pamphlet available for 20 minutes followed by the 10-minute lecture with Q&A session                                                                                                                                                                                                                                         | 3 months<br><br>questionnaire to be completed at the baseline, immediately after intervention and three months | both interventions were effective in increasing TTKS between baseline and follow-up (C vs P $p=0.015$ , C vs P+L $p=0.002$ ).<br><br>a 10-minute TDI lecture provided no additional benefit                                                                                                                                                                                                          |

|                                          |           |                                                                                     |                                                                                                                                                                |                                                                                                                                                            |                                                                               |                                                                                                                                                                                                                                                                                                                                                                                                |
|------------------------------------------|-----------|-------------------------------------------------------------------------------------|----------------------------------------------------------------------------------------------------------------------------------------------------------------|------------------------------------------------------------------------------------------------------------------------------------------------------------|-------------------------------------------------------------------------------|------------------------------------------------------------------------------------------------------------------------------------------------------------------------------------------------------------------------------------------------------------------------------------------------------------------------------------------------------------------------------------------------|
|                                          |           |                                                                                     | Intervention groups:<br>pamphlet (P) = 37<br>pamphlet + lecture (P+L)= 29<br><br>controls (C) = 45                                                             | presented topic: treatment of avulsed teeth<br><br>controls - no intervention                                                                              | after intervention                                                            | compared with an educational booklet (P vs P + L, NS).                                                                                                                                                                                                                                                                                                                                         |
| Holan et al. [21]<br>2006<br>Israel      | a seminar | pre-test post-test study design<br><br>questionnaire developed by authors           | physical education teachers<br><br>cluster sampling<br><br>baseline =126<br>follow up = 100 (including 70 teachers attending the seminar and 30 not attenders) | seminar + question and answer session on the topic presented at the biennial meeting of physical education teachers<br><br>topic presented: tooth avulsion | 10 months<br><br>pre-test carried out 6 months prior to intervention          | the percentage of teachers who gave correct answers was significantly higher in the second questionnaire than in the first one (p<0.001)<br><br>no difference in the percentage of teachers who gave correct answers in the second questionnaire among seminar participants and non-participants<br><br>"contamination effect" - sharing and disseminating information provided at the seminar |
| Al-Asfor A et al. [22]<br>2008<br>Kuwait | a lecture | one-group pre-test post-test study design<br><br>questionnaire developed by authors | teachers<br><br>cluster sampling<br><br>intervention group = 43                                                                                                | 30-minute lecture + question-and-answer session held at the school<br><br>topic presented: avulsion and replantation of a tooth                            | after intervention<br><br>pre-test carried out 6 months prior to intervention | Increase in knowledge in all surveyed areas from low to sufficient<br><br>problems with reaching the whole population                                                                                                                                                                                                                                                                          |

|                                               |           |                                                                                                                                                                                    |                                                                                                                                                                                                           |                                                                                                                                                       |          |                                                                                                                                                                                                            |
|-----------------------------------------------|-----------|------------------------------------------------------------------------------------------------------------------------------------------------------------------------------------|-----------------------------------------------------------------------------------------------------------------------------------------------------------------------------------------------------------|-------------------------------------------------------------------------------------------------------------------------------------------------------|----------|------------------------------------------------------------------------------------------------------------------------------------------------------------------------------------------------------------|
| Al-Asfor A, Andersson L [23] 2008 Kuwait      | a leaflet | post-test control group design<br><br>questionnaire developed by authors                                                                                                           | parents<br><br>cluster sampling/ randomization at the level of participant<br><br>intervention group = 85<br><br>controls = 75                                                                            | a leaflet<br><br>presented topic: tooth avulsion and replantation<br><br>controls - no intervention                                                   | 1 week   | subjects reading a leaflet got better scores than controls (data were not statistically analysed)<br><br>for an extra-oral time the knowledge gain was not sufficient                                      |
| Lieger O et al. [24] 2009 Switzerland         | a poster  | post-test control group design<br><br>self-administrated questionnaire send by mail to schools (10 questionnaires /school)<br><br>questionnaire form adapted from previous studies | teachers<br><br>cluster sampling<br><br>intervention group (teachers working in the area with poster distribution) = 185<br><br>controls (teachers working in the area without poster distribution) = 326 | a poster sent to all schools from Canton of Bern<br><br>presented topics: the emergency management of injured teeth<br><br>controls – no intervention | 5 years  | teachers who worked in the area where the posters were distributed had more knowledge about the management of different types of dental injuries (data not statistically analysed)                         |
| Frujeri M de L, Costa ED Jr. [25] 2009 Brazil | a lecture | pre-test post-test study design<br><br>questionnaire adapted from                                                                                                                  | different professionals<br><br>cluster sampling<br><br>intervention groups:                                                                                                                               | a 40 minute lecture + Q&A session<br><br>presented topics: tooth avulsion                                                                             | 2 months | in each group the percentage of correct answers was significantly higher after the lecture ( $p < 0.0001$ in teachers, physical education specialists and bank employees and $p < 0.01$ in paediatricians) |

|                                  |           |                                                                                                     |                                                                                                                                                        |                                                                                                                                             |                                |                                                                                                                                                                                                                                  |
|----------------------------------|-----------|-----------------------------------------------------------------------------------------------------|--------------------------------------------------------------------------------------------------------------------------------------------------------|---------------------------------------------------------------------------------------------------------------------------------------------|--------------------------------|----------------------------------------------------------------------------------------------------------------------------------------------------------------------------------------------------------------------------------|
|                                  |           | previous studies                                                                                    | elementary school teachers =102, physical education professionals = 124, bank employees = 103, dentists* = 100, paediatricians = 50                    |                                                                                                                                             |                                |                                                                                                                                                                                                                                  |
| Levin et al. [26] 2010 Israel    | a lecture | post-test control group design<br><br>questionnaire adapted from previous studies                   | 18-year-old men military recruits<br><br>cluster sampling/ randomization at the level of participant<br><br>intervention group = 199<br>controls = 137 | a 60-minute lecture<br><br>presented topics: body facial and oral injuries and their first-aid management<br><br>controls - no intervention | immediately after intervention | the intervention group presented better knowledge than controls (p<0.001)<br><br>a single lecture was not sufficient to deliver complete knowledge                                                                               |
| Karande N et al. [27] 2012 India | a lecture | one-group pre-test post-test study design<br><br>multiple choice questionnaire developed by authors | teachers<br><br>cluster sampling<br><br>Intervention group = 216                                                                                       | a lecture<br><br>presented topics: emergency management of dentoalveolar injuries                                                           | 3 months                       | improvements in knowledge were observed in the areas studied: TDI epidemiology, first aid in tooth avulsion and tooth fracture (no statistical analysis presented)<br><br>the level of knowledge on oral prostheses remained low |
| Arikan and Sönmez [28]           | a leaflet | one-group pre-test post-test study design                                                           | teachers<br><br>cluster sampling                                                                                                                       | a leaflet                                                                                                                                   | 1 month                        | teachers' knowledge of TDI increased significantly (p =                                                                                                                                                                          |



|                                                         |                                        |                                                                                                      |                                                                                                                                                                |                                                                                                                                                                                                                                            |          |                                                                                                                                                                                                                                                    |
|---------------------------------------------------------|----------------------------------------|------------------------------------------------------------------------------------------------------|----------------------------------------------------------------------------------------------------------------------------------------------------------------|--------------------------------------------------------------------------------------------------------------------------------------------------------------------------------------------------------------------------------------------|----------|----------------------------------------------------------------------------------------------------------------------------------------------------------------------------------------------------------------------------------------------------|
| 2012<br>Turkey                                          |                                        | questionnaire developed by authors                                                                   | intervention group = 450                                                                                                                                       | presented topics: traumatic dental injuries and their emergency management                                                                                                                                                                 |          | 0.0001) after distribution of the information leaflet                                                                                                                                                                                              |
| Skapetis et al. [29]<br>2012<br>Australia               | an interactive and multimodal workshop | one-group pre-test post-test study design<br><br>questionnaire developed by the authors              | physicians, nurse practitioners, medical students recruited<br><br>cluster sampling<br><br>intervention group: at the baseline = 242<br>at the follow up = 181 | workshops (lecture, video presentation, discussion, case study, models)<br><br>presented topics: dental nomenclature, dental anaesthesia, effective emergency treatment for common dental trauma, intraoral haemorrhage, dental infections | 6 months | the self-reported improvement in proficiency on dental emergency management including avulsion and dental trauma ( $p < 0.001$ )                                                                                                                   |
| Baginska and Wilczynska-Borawska [30]<br>2012<br>Poland | a lecture                              | post-test control group design<br><br>questionnaire adapted from previous studies                    | school nurses<br><br>cluster sampling<br><br>intervention group = 38<br><br>controls = 12                                                                      | a lecture conducted two years prior to survey<br><br>presented topics: management of TDI<br><br>controls - no intervention                                                                                                                 | 2 years  | a strong correlation between the level of knowledge and the participation in the lecture on dental trauma management ( $p < 0.01$ )                                                                                                                |
| Emerich et al. [31]<br>2013<br>Poland                   | a lecture + an additional task         | pre-test-post-test control group design<br><br>questionnaire form (three different scenarios of TDI) | physical education students<br><br>cluster sampling/randomization at the level of participant                                                                  | intervention group: a 30 minute lecture + an additional task of preparing a presentation on dental trauma to retain knowledge<br><br>controls: a 30 minute lecture + an additional task of preparing a presentation on different topic     | 1 year   | a lecture was sufficient to introduce basic knowledge on dental trauma ( $p < 0.001$ )<br><br>the effect was long-lasting<br><br>the additional task (preparing of the presentation) had no influence on the long term retention of knowledge (NS) |

|                                         |                             |                                                                                                                                                                  |                                                                                                                                                                                  |                                                                                                                                                                                                                                                                                                 |                                                                                    |                                                                                                                                                                                                                                                                                                                                                                                                                                                                                                            |
|-----------------------------------------|-----------------------------|------------------------------------------------------------------------------------------------------------------------------------------------------------------|----------------------------------------------------------------------------------------------------------------------------------------------------------------------------------|-------------------------------------------------------------------------------------------------------------------------------------------------------------------------------------------------------------------------------------------------------------------------------------------------|------------------------------------------------------------------------------------|------------------------------------------------------------------------------------------------------------------------------------------------------------------------------------------------------------------------------------------------------------------------------------------------------------------------------------------------------------------------------------------------------------------------------------------------------------------------------------------------------------|
|                                         |                             | adapted from previous studies                                                                                                                                    | intervention group = 49<br>controls = 50                                                                                                                                         | presented permanent injuries<br>topics: dentition                                                                                                                                                                                                                                               |                                                                                    |                                                                                                                                                                                                                                                                                                                                                                                                                                                                                                            |
| Soubra BN and Debs NN [32] 2013 Lebanon | an audio and visual methods | 1st intervention one-group pre-test post-test study design<br><br>2nd intervention post-test control group design<br><br>two-questions test developed by authors | pupils (8-11 years old)<br><br>cluster sampling/randomization – not specified<br><br>1st intervention Intervention group = 172<br><br>2nd intervention group A = 86 group B = 86 | 1st intervention: a cartoon movie<br><br>2nd intervention: visual <i>vs.</i> audio modes (group A - a cartoon twice: once without verbal commentary and once with comments, group B listen to the story twice, second time simultaneously with cartoon)<br><br>presented topics: tooth avulsion | 1st intervention: 3 months<br><br>2nd intervention: immediately after intervention | 1st intervention watching cartoon movie resulted in increasing the knowledge ( $p<0.001$ )<br><br>2nd intervention a message repetition increased the number of correct answers (group A $p<0.001$ , group B $p=0.03$ )<br><br>both methods of providing information (two projections and one reading <i>vs.</i> two readings and one projection) were similarly effective (NS)<br><br>telling a story has a greater impact than a silent movie ( $p<0.001$ )<br><br>children preferred cartoon than story |
| Ghaderi et al. [33] 2013 Iran           | a leaflet                   | post-test control group design<br><br>questionnaire adapted from previous studies                                                                                | parents<br><br>cluster sampling/randomization at the level of participant                                                                                                        | a leaflet + an assistance of a senior dental student<br><br>controls - no intervention<br><br>presented topics: tooth avulsion                                                                                                                                                                  | 1 week                                                                             | the leaflet + the assistance of knowledgeable dental staff improved the level of parents' knowledge (data were not statistically analysed)                                                                                                                                                                                                                                                                                                                                                                 |

|                                          |           |                                                                                                                            |                                                                                                                              |                                                                                                                                                  |              |                                                                                                                                                                                                                                                                           |
|------------------------------------------|-----------|----------------------------------------------------------------------------------------------------------------------------|------------------------------------------------------------------------------------------------------------------------------|--------------------------------------------------------------------------------------------------------------------------------------------------|--------------|---------------------------------------------------------------------------------------------------------------------------------------------------------------------------------------------------------------------------------------------------------------------------|
|                                          |           |                                                                                                                            | intervention group = 75<br>controls = 75                                                                                     |                                                                                                                                                  |              |                                                                                                                                                                                                                                                                           |
| Pujita et al. [34]<br>2013<br>India      | a lecture | pre-test-post-test study design<br><br>questionnaire developed by authors                                                  | teachers<br><br>cluster sampling<br><br>intervention group = 1000 (urban group = 500 and rural group = 500)                  | a 30 minute lecture + Q&A session<br><br>presented topics: management of TDI                                                                     | 3 months     | an improvement in teachers' knowledge was observed (data were not statistically analysed)<br><br>according to the authors, the knowledge gain was below the expected level                                                                                                |
| Young C et al. [35]<br>2013<br>Hong Kong | a poster  | cluster randomised controlled trial<br><br>post-test control group design<br><br>questionnaire adapted from previous study | teachers<br><br>cluster sampling/ randomization at the level of school<br><br>intervention group = 196<br><br>controls = 212 | a poster (three copies available for teachers for two weeks)<br><br>presented topics: dental trauma management<br><br>controls - no intervention | up to 1 week | the posters improved the knowledge about dental trauma management in those subjects who had not previously learned about dental emergencies from other sources than first aid training ( $p < 0.0001$ )                                                                   |
| Young C et al. [36]<br>2014<br>Hong Kong | a poster  | cluster randomised controlled trial<br><br>post-test control group design                                                  | pupils (11-20 years)<br><br>cluster sampling/ randomization at the level of school<br><br>intervention group = 364           | a poster (three copies available for pupils for two weeks)<br><br>presented topics: dental trauma management<br><br>controls - no intervention   | up to 1 week | a two week display of the educational poster improved the level of pupils' knowledge on the emergency management of dental trauma in comparison to the control group ( $p = 0.04$ )<br><br>Respondents have problems with acquisition of some information from the poster |

|                              |                                                          |                                                                                                              |                                                                                                                                          |                                                                                                                                                                                       |                                                                                                                                |                                                                                                                                                                                                                                                                                |
|------------------------------|----------------------------------------------------------|--------------------------------------------------------------------------------------------------------------|------------------------------------------------------------------------------------------------------------------------------------------|---------------------------------------------------------------------------------------------------------------------------------------------------------------------------------------|--------------------------------------------------------------------------------------------------------------------------------|--------------------------------------------------------------------------------------------------------------------------------------------------------------------------------------------------------------------------------------------------------------------------------|
|                              |                                                          | questionnaire adapted from previous study                                                                    | controls = 303 pupils                                                                                                                    |                                                                                                                                                                                       |                                                                                                                                |                                                                                                                                                                                                                                                                                |
| Raouf et al. [37] 2014 Iran  | a multimodal educational intervention (lecture + poster) | one-group pre-test post-test design<br><br>questionnaire adapted from previous study                         | health teachers<br><br>cluster sampling<br><br>intervention group = 38                                                                   | a 120 minute lecture + Q&A session + an informative poster<br><br>presented topics: general concepts of dental trauma and emergency handling of crown fractures and avulsion injuries | 3 years<br><br>questionnaire to be completed at the baseline, immediately after intervention and three year after intervention | a multifaceted educational programme resulted in significant short- and long-term improvements in TDI emergency management knowledge (p<0.017)<br><br>participants' self-assessment of their ability to take appropriate action when needed increased significantly (p=0.0001) |
| Ghadimi et al [38] 2014 Iran | a poster                                                 | pre-test post-test control group design<br><br>questionnaire developed by the authors including cases of TDI | school health teachers<br><br>cluster sampling/ randomization at the level of school<br><br>intervention group = 30<br><br>controls = 10 | an educational poster<br><br>presented topics: management of TDI<br><br>controls: no intervention                                                                                     | 1 month                                                                                                                        | the percentage of correct answers in the test group increased significantly in the test group one month after the intervention (p<0.001)                                                                                                                                       |

|                                       |                                                                                                  |                                                                                                                                                             |                                                                                                                                                                              |                                                                                                                                                                                                             |                                                                                                                                              |                                                                                                                                                                                                                                                                               |
|---------------------------------------|--------------------------------------------------------------------------------------------------|-------------------------------------------------------------------------------------------------------------------------------------------------------------|------------------------------------------------------------------------------------------------------------------------------------------------------------------------------|-------------------------------------------------------------------------------------------------------------------------------------------------------------------------------------------------------------|----------------------------------------------------------------------------------------------------------------------------------------------|-------------------------------------------------------------------------------------------------------------------------------------------------------------------------------------------------------------------------------------------------------------------------------|
| Grewal et al. [39]<br>2015<br>India   | a multimodal educational intervention (flip cards + poster + interactive sessions and a lecture) | pre-test post-test study design<br><br>two questionnaires developed by authors: one for parents and school teachers and second for children aged 7–12 years | school teachers/sport coaches, pupils (7–12 years old), parents<br><br>cluster sampling<br><br>intervention groups: pupils = 200 parents = 200 teachers/sports coaches = 189 | 1st step: flip cards + a poster placed in the medical room at school<br><br>2nd step: reinforcement session by an interactive sessions and a re-orientation lecture<br><br>presented topics: tooth avulsion | 6 months<br><br>questionnaire to be completed two months before intervention, one month after intervention and six months after intervention | an improvement in the knowledge of teachers, parents and pupils about tooth avulsion was observed ( $p < 0.001$ )                                                                                                                                                             |
| Perazzo et al. [40]<br>2015<br>Brazil | a lecture                                                                                        | one-group pre-test post-test study design<br><br>questionnaire adapted from previous studies                                                                | firefighters<br><br>cluster sampling<br><br>intervention group = 90                                                                                                          | a lecture + a Q&A session<br><br>presented topics: tooth avulsion                                                                                                                                           | 6 months<br><br>questionnaire to be completed at the baseline, immediately after intervention and six months after intervention              | the intervention resulted in significant short- and long-term improvements in knowledge of tooth avulsion ( $p < 0.001$ )<br><br>attitudes of paramedics towards tooth replantation decreased over time ( $p = 0.001$ )<br><br>the need for repeated interventions was raised |
| Iskander et al. [41]<br>2016<br>USA   | a mobile application <i>vs.</i> a poster                                                         | post-test study design<br><br>written questionnaire developed by authors and oral interview questions                                                       | parents<br><br>cluster sampling/randomization at the level of participant<br><br>intervention groups:                                                                        | 1st intervention: one educational tool (mobile application or poster) was used<br><br>2nd intervention: subjects received the other tool to find the participants' preferences                              | immediately after intervention                                                                                                               | 1st intervention: both a poster and a mobile healthcare application are effective in delivering TDI information, but respondents using an application significantly more likely immediate replantation as a best option in tooth avulsion ( $p < 0.007$ )                     |

|                                                |                                                                                                    |                                                                                      |                                                                                                                                                                           |                                                                                                                                                                            |                                                                                                                                 |                                                                                                                                                                                                                                                                      |
|------------------------------------------------|----------------------------------------------------------------------------------------------------|--------------------------------------------------------------------------------------|---------------------------------------------------------------------------------------------------------------------------------------------------------------------------|----------------------------------------------------------------------------------------------------------------------------------------------------------------------------|---------------------------------------------------------------------------------------------------------------------------------|----------------------------------------------------------------------------------------------------------------------------------------------------------------------------------------------------------------------------------------------------------------------|
|                                                |                                                                                                    | conducted by the researcher                                                          | mobile application = 45<br>poster = 44                                                                                                                                    | presented topics:<br>management of TDI                                                                                                                                     |                                                                                                                                 | 2nd intervention:<br>the participants preferred the tool they were given first                                                                                                                                                                                       |
| Cruz-da-Silva BR et al. [42]<br>2016<br>Brazil | a multimodal educational intervention (lecture + pamphlet)                                         | one-group pre-test post-test study design<br><br>questionnaire developed by authors  | non-dental health professional involved in the emergency care service<br><br>cluster sampling<br><br>intervention group = 73 (11 physicians, 41 nurses and 21 paramedics) | a 40 minute lecture + a pamphlet<br><br>presented topics: tooth avulsion                                                                                                   | 6 months<br><br>questionnaire to be completed at the baseline, immediately after intervention and six months after intervention | improvement in nurses' attitudes towards tooth replantation was observed both immediately after the intervention and six months later (p<0.001)                                                                                                                      |
| Taranath M et al. [43]<br>2017<br>India        | a PowerPoint presentation                                                                          | one-group pre-test post-test design<br><br>questionnaire adapted from previous study | school teachers<br><br>cluster sampling<br><br>intervention group = 214                                                                                                   | a PowerPoint presentation and demonstration of the first aid procedures in tooth avulsion using a typodont<br><br>presented topics: tooth avulsion                         | 1 month                                                                                                                         | the knowledge and the attitude towards the management of tooth avulsion were raised (p<0.0001)                                                                                                                                                                       |
| Al-Musawi A et al. [44]<br>2017<br>Kuwait      | a lecture vs. a lecture + access to the Dental Trauma App vs. access to the Dental Trauma App only | pre-test post-test study design<br><br>questionnaire adapted from previous study     | female teacher<br><br>convenience sampling<br><br>intervention groups:<br>Group 1: lecture = 32                                                                           | a 30-minute lecture<br><br>a lecture + access to the Dental Trauma App when being tested<br><br>no formal instructions + access to the Dental Trauma App when being tested | immediately after intervention                                                                                                  | all methods were effective means of knowledge transfer about tooth avulsion (group 1 p=0.001, group 2 p=0.019, group 3 p=0.000)<br><br>the Dental Trauma App alone was superior to a lecture-based delivery of information (the active learning component) (p<0.001) |

|                                               |                                                                                      |                                                                                        |                                                                                                                  |                                                                                                                         |                                                                                                                                           |                                                                                                                                                                       |
|-----------------------------------------------|--------------------------------------------------------------------------------------|----------------------------------------------------------------------------------------|------------------------------------------------------------------------------------------------------------------|-------------------------------------------------------------------------------------------------------------------------|-------------------------------------------------------------------------------------------------------------------------------------------|-----------------------------------------------------------------------------------------------------------------------------------------------------------------------|
|                                               |                                                                                      |                                                                                        | Group 2: lecture + App = 27<br>Group 3: App = 28                                                                 | presented topics: tooth avulsion                                                                                        |                                                                                                                                           |                                                                                                                                                                       |
| Yordi et al. [45] 2017 Lebanon                | a multimodal educational intervention (Power Point presentation + brochure + poster) | pre-test post-test study design<br>questionnaire adapted from previous study           | Teachers<br>cluster sampling/randomization at the level of school<br>intervention groups = 300<br>controls = 300 | a Power point presentation + a brochure + a poster<br>presented topics: management of TDI<br>controls - no intervention | 6 months                                                                                                                                  | the educational program using more than one modality proved to be effective in improving teachers' knowledge (p<0.001)<br><br>the improvement persisted over the time |
| Al Sari et al. [46] 2018 United Arab Emirates | a multimodal educational intervention (workshop + poster)                            | one-group pre-test post-test study design<br>questionnaire adapted from previous study | school nurses and physical education teachers<br>cluster sampling<br>Intervention group = 68                     | a workshop + a poster<br>presented topics: management of TDI                                                            | 3 months<br>questionnaire to be completed at the baseline (A), immediately after intervention (B) and three months after intervention (C) | a significant improvement in the score of knowledge between survey A and B and A and C was observed (p<0.01)<br><br>the knowledge gain sustained after 3 months       |
| Nagata et al. [47] 2018 Brazil                | a lecture                                                                            | pre-test post-test study design<br>questionnaire developed by authors                  | health courses' students<br>cluster sampling<br>intervention groups: dentistry students* = 70                    | a 40-minute lecture + a Q&A session<br>presented topics: avulsion and crown fractures                                   | immediately after intervention                                                                                                            | there was a significant improvement in knowledge of dental emergencies following the educational intervention (p<0.001)                                               |

|                                          |                                                |                                                                                                   |                                                                                                                                                                       |                                                                                                               |                                                                                                                                                              |                                                                                                                                                                                                                                                                        |
|------------------------------------------|------------------------------------------------|---------------------------------------------------------------------------------------------------|-----------------------------------------------------------------------------------------------------------------------------------------------------------------------|---------------------------------------------------------------------------------------------------------------|--------------------------------------------------------------------------------------------------------------------------------------------------------------|------------------------------------------------------------------------------------------------------------------------------------------------------------------------------------------------------------------------------------------------------------------------|
|                                          |                                                |                                                                                                   | nursing students = 33<br>speech therapy students = 22                                                                                                                 |                                                                                                               |                                                                                                                                                              |                                                                                                                                                                                                                                                                        |
| Nashine et al. [48]<br>2018<br>India     | an audio vs. audio-visual aids (not specified) | one-group pre-test post-test study design<br><br>questionnaire developed by authors               | teachers<br><br>two-stage cluster sampling<br><br>Intervention group = 158<br><br>Participants were divided into audio and audio-visual groups (number not specified) | an intervention through audio or audio-visual aids (not specified)<br><br>presented topics: management of TDI | immediately after intervention                                                                                                                               | an improvement in knowledge and attitude was observed for whole group (data were not statistically analysed)<br><br>no difference was found with regard to audio and audio-visual aids (NS)                                                                            |
| Niviethitha et al. [49]<br>2018<br>India | an interactive educational DVD video           | one-group pre-test post-test study design<br><br>questionnaire adapted from previous study        | teachers<br><br>randomisation at the level of school and participant<br><br>intervention group = 301                                                                  | an interactive educational DVD video (7-8 minutes)<br><br>presented topics: management of TDI                 | immediately after intervention                                                                                                                               | significant improvement in knowledge of TDI management ( $p < 0.0001$ )<br><br>increase in participants' attitude in dealing with tooth avulsion ( $p < 0.0001$ )                                                                                                      |
| Razeghi et al. [50]<br>2019<br>Iran      | a leaflet vs. a lecture                        | cluster randomized controlled trial<br><br>pre-test post-test study design<br><br>a questionnaire | teachers<br><br>cluster sampling/ randomisation at the level participant<br><br>intervention groups: leaflet = 154                                                    | a leaflet<br><br>a 45-minute lecture<br><br>presented topics: management of TDI                               | 6 months<br><br>questionnaire to be completed at the beginning, one month after the end of the intervention and six months after the end of the intervention | knowledge gains were observed in both intervention groups ( $p < 0.001$ )<br><br>no statistically significant difference in mean knowledge and self-practice scores between the two intervention groups (NS)<br><br>self-practice was weakly correlated with knowledge |



|  |  |                         |               |  |  |  |
|--|--|-------------------------|---------------|--|--|--|
|  |  | developed by<br>authors | lecture = 138 |  |  |  |
|--|--|-------------------------|---------------|--|--|--|
